# Supplementary material for: Effects of cerebral small vessel disease on the outcomes in cryptogenic stroke with active cancer
Source: PubMed Central journal article supplement (PMC8410810; doi:10.1038/s41598-021-97154-1), 2021-09-01
Supplement: 41598_2021_97154_MOESM1_ESM.pdf [file 41598_2021_97154_MOESM1_ESM.pdf]

## Supplemental information

**Supplementary Table 1. Baseline characteristics of the study population (n = 179)**

| <b>Demographic &amp; clinical factors</b>    |              |
|----------------------------------------------|--------------|
| Age, y [SD]                                  | 67 ± 10      |
| Sex, male, n (%)                             | 108 (60.3)   |
| Hypertension, n (%)                          | 77 (43.0)    |
| Diabetes, n (%)                              | 55 (30.7)    |
| Dyslipidemia, n (%)                          | 76 (42.5)    |
| Current smoking, n (%)                       | 61 (34.1)    |
| Cancer type, n (%)                           |              |
| Lung                                         | 52 (29.1)    |
| Gastric/esophageal                           | 17 (9.5)     |
| Colorectal                                   | 10 (5.6)     |
| Hepatobiliary                                | 55 (30.7)    |
| Genitourinary                                | 36 (20.1)    |
| Breast                                       | 4 (2.2)      |
| Others                                       | 5 (2.8)      |
| Systemic metastasis, n (%)                   | 104 (58.1)   |
| Adenocarcinoma, n (%)                        | 93 (59.2)    |
| Initial NIHSS score [SD]                     | 7 ± 6        |
| Thrombolytic therapy, n (%)                  | 13 (7.3)     |
| <b>Laboratory factors</b>                    |              |
| HbA1c, % [SD]                                | 6.1 ± 0.9    |
| Fasting blood sugar, mg/dL [SD]              | 107 ± 35     |
| Total cholesterol, mg/dL [SD]                | 170 ± 52     |
| White blood cell, x 10 <sup>3</sup> /μL [SD] | 8.18 ± 3.47  |
| High-sensitivity CRP, mg/dL [SD]             | 4.16 ± 5.85  |
| D-dimer, μg/mL [SD]                          | 7.94 ± 12.96 |
| <b>Radiological factors</b>                  |              |
| MRI lesion pattern, n (%)                    |              |
| Single territory                             | 85 (47.5)    |
| Multiple territory                           | 94 (52.5)    |
| Periventricular WMH (Fazekas scale), [SD]    | 1 ± 1        |
| Subcortical WMH (Fazekas scale), [SD]        | 0 ± 1        |

|                             |           |
|-----------------------------|-----------|
| Silent brain infarct, n (%) | 65 (36.3) |
| Cerebral microbleeds, n (%) | 41 (22.9) |

**Clinical outcomes**

|                                         |           |
|-----------------------------------------|-----------|
| Early neurological deterioration, n (%) | 31 (17.3) |
| 3-months Modified Rankin Scale [SD]     | 3 ± 2     |

---

NIHSS = National Institutes of Health Stroke Scale, CRP = c-reactive protein, MRI = magnetic resonance imaging, WMH = white matter hyperintensity

**Supplementary Table 2. Comparisons of characteristics according to the burden of silent brain infarcts**

|                           | Silent brain infarct |                   |                   | <i>P</i> -value | <i>P</i> for trend |
|---------------------------|----------------------|-------------------|-------------------|-----------------|--------------------|
|                           | None                 | Single            | Multiple          |                 |                    |
| Age                       | 68 [59-73]           | 70 [60-77]        | 70 [62-77]        | 0.125           | 0.042              |
| Sex                       | 64 (56.1)            | 13 (50.0)         | 31 (79.5)         | 0.019           | 0.024              |
| Systemic metastasis       | 66 (57.9)            | 14 (53.8)         | 24 (61.5)         | 0.825           | 0.773              |
| Adenocarcinoma            | 58 (55.2)            | 15 (65.2)         | 20 (69.0)         | 0.337           | 0.149              |
| Initial NIHSS score       | 3 [2-7]              | 7 [4-13]          | 7 [3-14]          | 0.002           | 0.001              |
| White blood cell          | 7.42 [5.75-10.36]    | 7.33 [5.64-10.29] | 8.02 [5.92-9.44]  | 0.899           | 0.756              |
| High-sensitivity CRP      | 1.39 [0.25-5.31]     | 1.31 [0.58-7.56]  | 0.87 [0.24-5.27]  | 0.594           | 0.858              |
| D-dimer                   | 1.99 [0.70-5.43]     | 3.01 [0.80-11.84] | 5.33 [1.48-18.02] | 0.040           | 0.014              |
| Multiple territory lesion | 56 (49.1)            | 13 (50.0)         | 25 (64.1)         | 0.260           | 0.129              |

NIHSS = National Institutes of Health Stroke Scale, CRP = c-reactive protein
